# Supplementary material
Source: Springer Nature journal article supplement (https://www.springermedizin.de/resource/supplementary/12963_2013_259_MOESM2_ESM.pdf/9572446)

BMI, Time of Survey

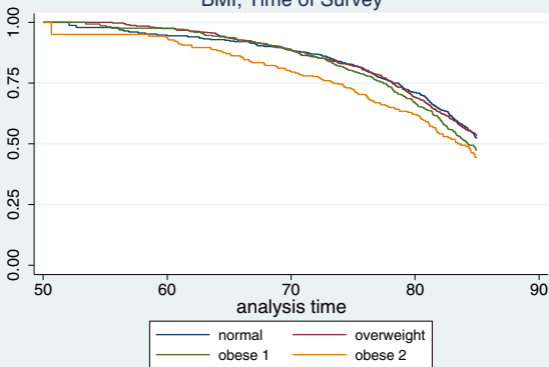

BMI, Maximum

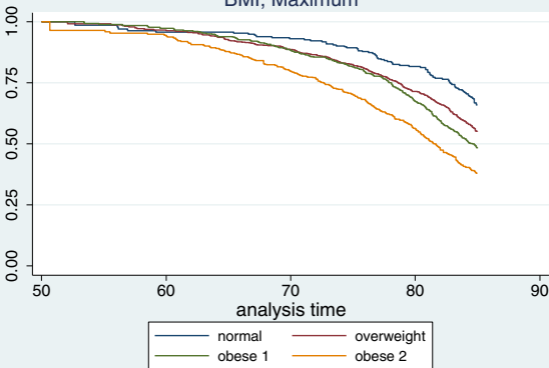

Supplement: MOESM2 [file 9572446]
